# Supplementary material for: Deletion of the Androgen Receptor in Adipose Tissue in Male Mice Elevates Retinol Binding Protein 4 and Reveals Independent Effects on Visceral Fat Mass and on Glucose Homeostasis
Source: PubMed Central journal article supplement — Diabetes. 2012 Apr 13;61(5):1072–81. doi: 10.2337/db11-1136 (PMC3331763; doi:10.2337/db11-1136), 2012-04-13
Supplement: supp_db11-1136_DB111136SupplementaryData.pdf [file supp_db11-1136_DB111136SupplementaryData.pdf]

SUPPLEMENTARY DATA

**Supplementary Table 1.** Quantitative PCR primer details. Sequence of primers for mouse genes; adiponectin, AR exon 2, adipose triglyceride lipase (ATGL), fatty-acid synthase (FAS), hormone sensitive lipase (HSL), lipoprotein lipase (LPL), leptin, retinol-binding protein 4 (RBP4), resistin,  $\beta$ -actin and cyclophilin, along with corresponding probe number from Roche Universal Probe Library.

| <i>Gene</i>                        | <i>Forward primer</i>          | <i>Reverse Primer</i>      | <b>UPL Probe No.</b> |
|------------------------------------|--------------------------------|----------------------------|----------------------|
| <b>Adiponectin</b>                 | GGA GAG AAA GGA GAT GCA GGT    | CTT TCC TGC CAG GGG TTC    | 17                   |
| <b>AR exon 2</b>                   | CCA GTC CCA ATT GTG TCA AA     | TCC CTG GTA CTG TCC AAA CG | 58                   |
| <b>Adipose triglyceride lipase</b> | GGT CCT TTG GTT CCA CAC AG     | CCT CTC GAA GGC TCT CTT CC | 67                   |
| <b>Fatty-acid synthase</b>         | TGC TCC AGG GAT AAC AGC        | CCA AAT CCA ACA TGG GAC A  | 34                   |
| <b>Hormone sensitive lipase</b>    | GCG CTG GAG GAG TGT TTT T      | CCG CTC TCC AGT TGA ACC    | 3                    |
| <b>Leptin</b>                      | CAG GAT CAA TGA CAT TTC ACA CA | GCT GGT GAG GAC CTG TTG AT | 93                   |
| <b>Lipoprotein lipase</b>          | CTC GCT CTC AGA TGC CCT AC     | GGT TGT GTT GCT TGC CAT T  | 95                   |
| <b>RBP4</b>                        | CTG TGG ACG AGA AGG GTC AT     | ACA CAC TTC CCA GTT GCT CA | 76                   |
| <b>Resistin</b>                    | AAC TCC CTG TTT CCA AAT GC     | AGC AGC TCA AGA CTG CTG TG | 25                   |
| <b><math>\beta</math>-actin</b>    | CTA AGG CCA ACC GTG AAA AG     | ACC AGA GGC ATA CAG GGA CA | 64                   |
| <b>Cyclophilin</b>                 | CAA GAA AAG GCC CAG TCG        | TTC CTG CAG CAT CCA CAG    | 17                   |
